# Supplementary material for: Layered tellurides: stacking faults induce low thermal conductivity in the new In2Ge2Te6 and thermoelectric properties of related compounds
Source: Royal Society of Chemistry journal article supplement (doi:10.1039/c7ta04810f), 2017-01-01
Supplement: c7ta04810f1.pdf [file c7ta04810f1.pdf]

SFig.1

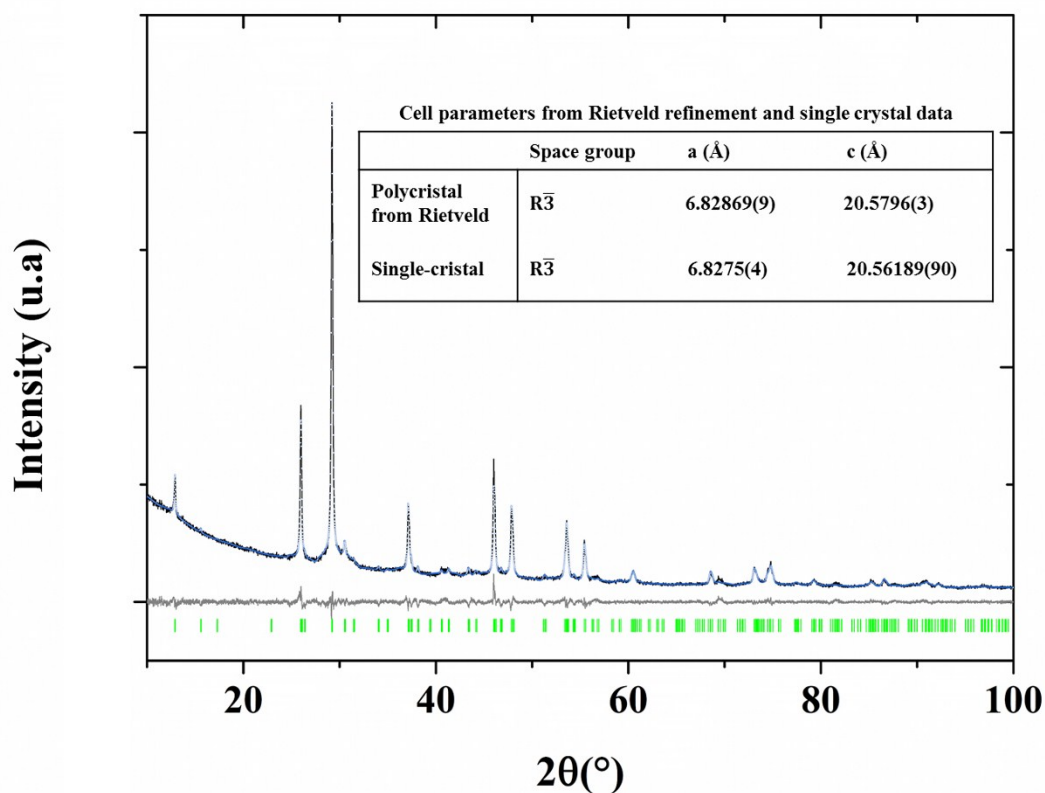

**SFigure 1.** Rietveld refinement plot for polycrystalline  $\text{Cr}_2\text{Ge}_2\text{Te}_6$ . Plot is represented as follows: observed (black line), calculated (blue dot), and difference (grey line) intensities. Bragg positions are indicated by green vertical bars. The included table shows the correspondence between the parameters of single-crystal characterization<sup>16</sup> and the present Rietveld refinement.

**STable 1.** SPS Conditions Used to Densify the Four Polycrystalline Samples.

| Compositions                        | Heating time        | Heating temperature | Remaining time | Cooling time | Pressure at all steps |
|-------------------------------------|---------------------|---------------------|----------------|--------------|-----------------------|
| $\text{InSiTe}_3$                   | 2h30 (Step by Step) | 773 K               | 30 min         | 60 min       | 28 MPa                |
| $\text{Cr}_2\text{Si}_2\text{Te}_6$ | 2h (Step by Step)   |                     |                |              |                       |
| $\text{In}_2\text{Ge}_2\text{Te}_6$ | 45 min              | 710 K               |                | 45 min       | 64 MPa                |
| $\text{Cr}_2\text{Ge}_2\text{Te}_6$ |                     | 823 K               |                |              |                       |

STable 2. Details on the Structure Refinement of Polycrystalline Cr<sub>2</sub>Ge<sub>2</sub>Te<sub>6</sub> and Atomic Coordinates (x,y,z), Site Occupation Factors, Isotropic Displacement Parameters (Å<sup>2</sup>) and their Estimated Standard Deviations Obtained from the Rietveld Refinement of Cr<sub>2</sub>Ge<sub>2</sub>Te<sub>6</sub>.

| Physical, Crystallographic and Analytic data                                                                         |                  |                                                 |            |           |            |                                    |
|----------------------------------------------------------------------------------------------------------------------|------------------|-------------------------------------------------|------------|-----------|------------|------------------------------------|
| compound                                                                                                             |                  | Cr <sub>2</sub> Ge <sub>2</sub> Te <sub>6</sub> |            |           |            |                                    |
| diffractometer radiation (Å)                                                                                         |                  | CuK $\alpha$ , $\beta$ = 1.540600 and 1.544400  |            |           |            |                                    |
| 2 $\theta$ range (deg), no. of points                                                                                |                  | 5 – 120, 8758                                   |            |           |            |                                    |
| step size (deg)                                                                                                      |                  | 0.013130                                        |            |           |            |                                    |
| no. of background points                                                                                             |                  | 93                                              |            |           |            |                                    |
| profile function                                                                                                     |                  | Thompson-Cox-Hastings pseudo-Voigt              |            |           |            |                                    |
| no. of refined parameters                                                                                            |                  | 16                                              |            |           |            |                                    |
| space group                                                                                                          |                  | R $\bar{3}$                                     |            |           |            |                                    |
| unit-cell parameters (Å)                                                                                             |                  | a = b                                           | 6.82869(9) |           |            |                                    |
|                                                                                                                      |                  | c =                                             | 20.5796(3) |           |            |                                    |
| cell volume (Å <sup>3</sup> )                                                                                        |                  | 831.08(2)                                       |            |           |            |                                    |
| reliability factors                                                                                                  |                  | R <sub>F</sub> (%)                              | 7.83       |           |            |                                    |
|                                                                                                                      |                  | R <sub>B</sub> (%)                              | 6.06       |           |            |                                    |
|                                                                                                                      |                  | R <sub>WP</sub> (%)                             | 4.08       |           |            |                                    |
|                                                                                                                      |                  | $\chi^2$                                        | 2.43       |           |            |                                    |
| Refined coordinates, Atomic Displacement Parameters and their Estimated Standard Deviations from Rietveld Refinement |                  |                                                 |            |           |            |                                    |
| atom                                                                                                                 | Wyckoff position | occ                                             | x          | y         | z          | U <sub>iso</sub> (Å <sup>2</sup> ) |
| Cr                                                                                                                   | 6c               | 1                                               | 0          | 0         | 0.3283(5)  | 0.054(3)                           |
| Ge                                                                                                                   | 6c               | 1                                               | 0          | 0         | 0.0612(3)  | 0.076(3)                           |
| Te                                                                                                                   | 18f              | 1                                               | 0.0025(7)  | 0.3534(3) | 0.08442(1) | 0.049(0)                           |

## **CAPTIONS:**

### **Svid:**

**Svid1.** X-ray diffraction evolution in temperature of the reflection intensities corresponding to InSiTe<sub>3</sub>, In<sub>2</sub>Te<sub>3</sub> and Si<sub>2</sub>Te<sub>3</sub>, resulting from the incongruent melting of the InSiTe<sub>3</sub> compound
